# Supplementary material for: Progress and challenges in biomaterials used for bone tissue engineering: bioactive glasses and elastomeric composites
Source: PubMed Central journal article supplement (PMC5120665; doi:10.1186/2194-0517-1-2), 2012-09-26

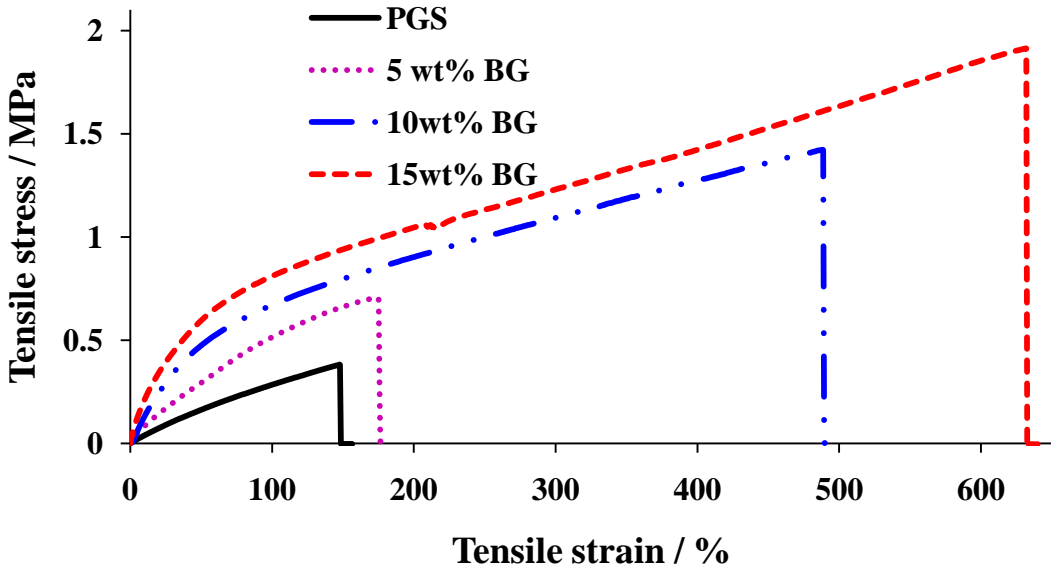

Supplement: 40204_2012_2_MOESM1_ESM.pdf [file 40204_2012_2_MOESM1_ESM.pdf]
